# Supplementary material for: De Novo Transcriptome Analysis of Solanum lycopersicum cv. Super Strain B under Drought Stress
Source: MDPI journal article supplement (doi:10.3390/agronomy13092360), 2023-09-11
Supplement: s1 [file s1]

## De novo transcriptome analysis of *Solanum lycopersicum* cv. super strain B under drought stress

**Hassan S. Al-Zahrani<sup>a</sup>, Tarek A. A. Moussa<sup>a,b,\*</sup>, Hameed Alsamadany<sup>a</sup>, Rehab M. Hafez<sup>b</sup> and Michael P. Fuller<sup>c</sup>**

<sup>a</sup> Biological Sciences Department, Faculty of Science, King Abdulaziz University, Jeddah, Saudi Arabia

<sup>b</sup> Botany and Microbiology Department, Faculty of Science, Cairo University, Giza 12613, Egypt

<sup>c</sup> School of Biological and Marine Science, Faculty of Science and Engineering, University of Plymouth, Plymouth, UK

**File S2.1.** Basic statistics of the of the raw data in the cv. super strain B transcriptome under drought stress (fastq 2).

| Measure                           | Value                   |
|-----------------------------------|-------------------------|
| Filename                          | 2.fastq                 |
| File type                         | Conventional base calls |
| Encoding                          | Sanger / Illumina 1.9   |
| Total Sequences                   | 41779729                |
| Sequences flagged as poor quality | 0                       |
| Sequence length                   | 151                     |
| %GC                               | 44                      |

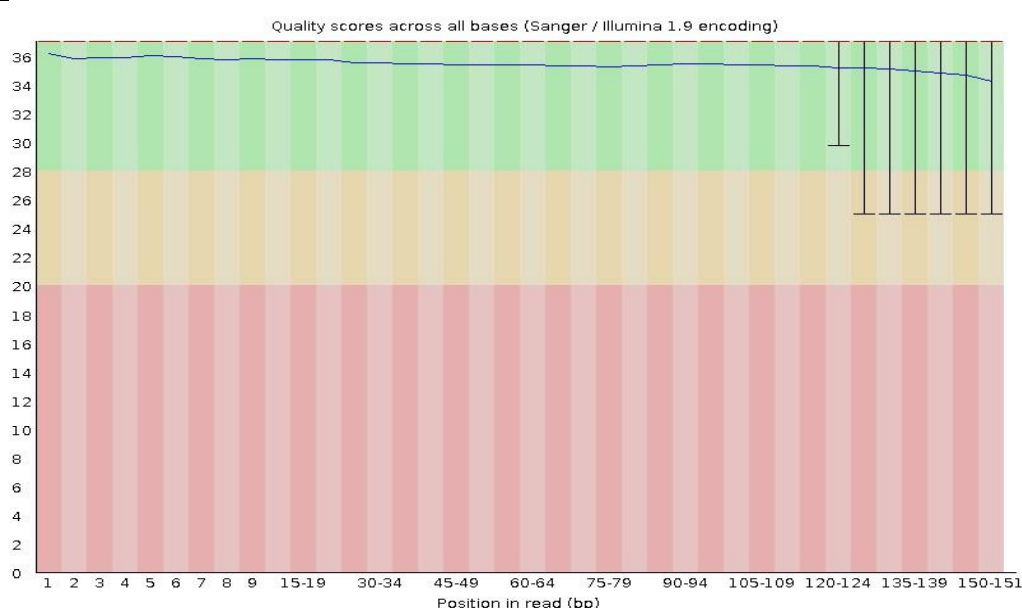

**File S2.2.** Summary of per base sequence quality of the raw data in the cv. super strain B transcriptome under drought stress (fastq 2).

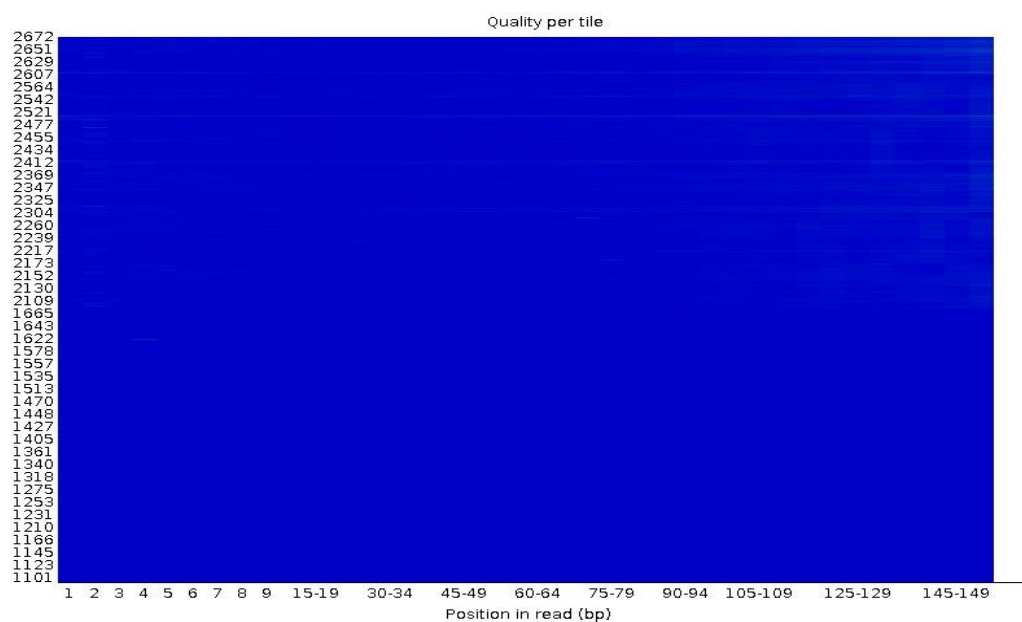

**File S2.3.** Summary of per tile sequence quality of the raw data in the cv. super strain B transcriptome under drought stress (fastq 2).

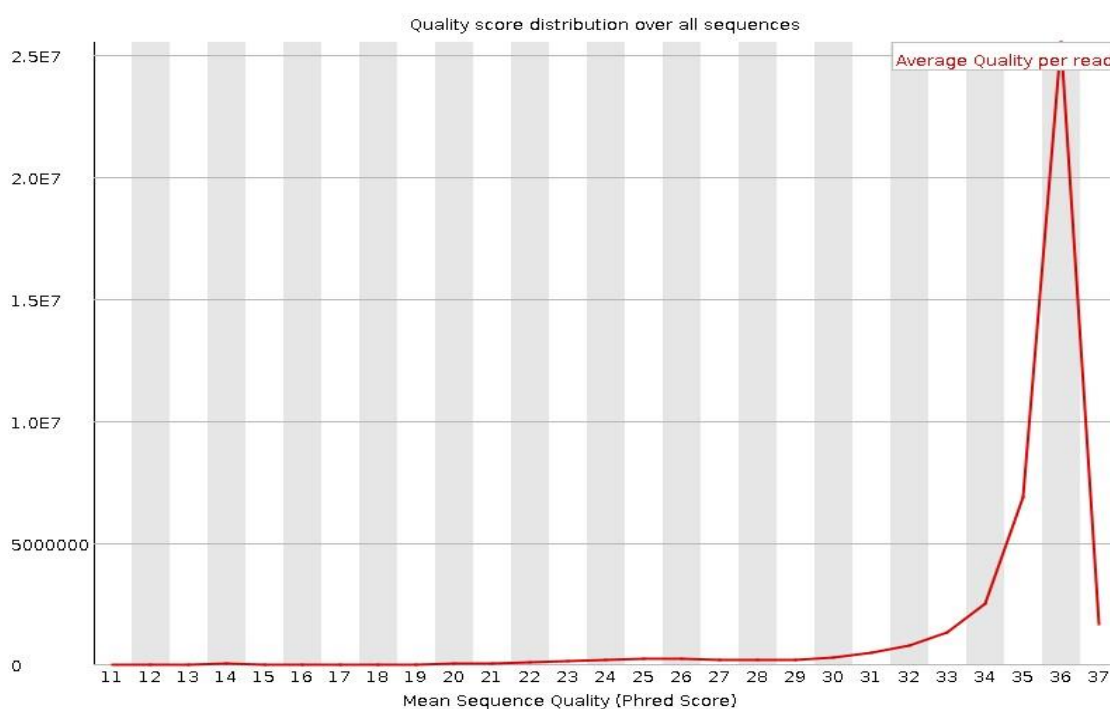

**File S2.4.** Summary of per sequence quality scores of the raw data in the cv. super strain B transcriptome under drought stress (fastq 2).

**File S1.5.** Summary of per base sequence content of the raw data in the cv. super strain B transcriptome under drought stress (fastq 1).

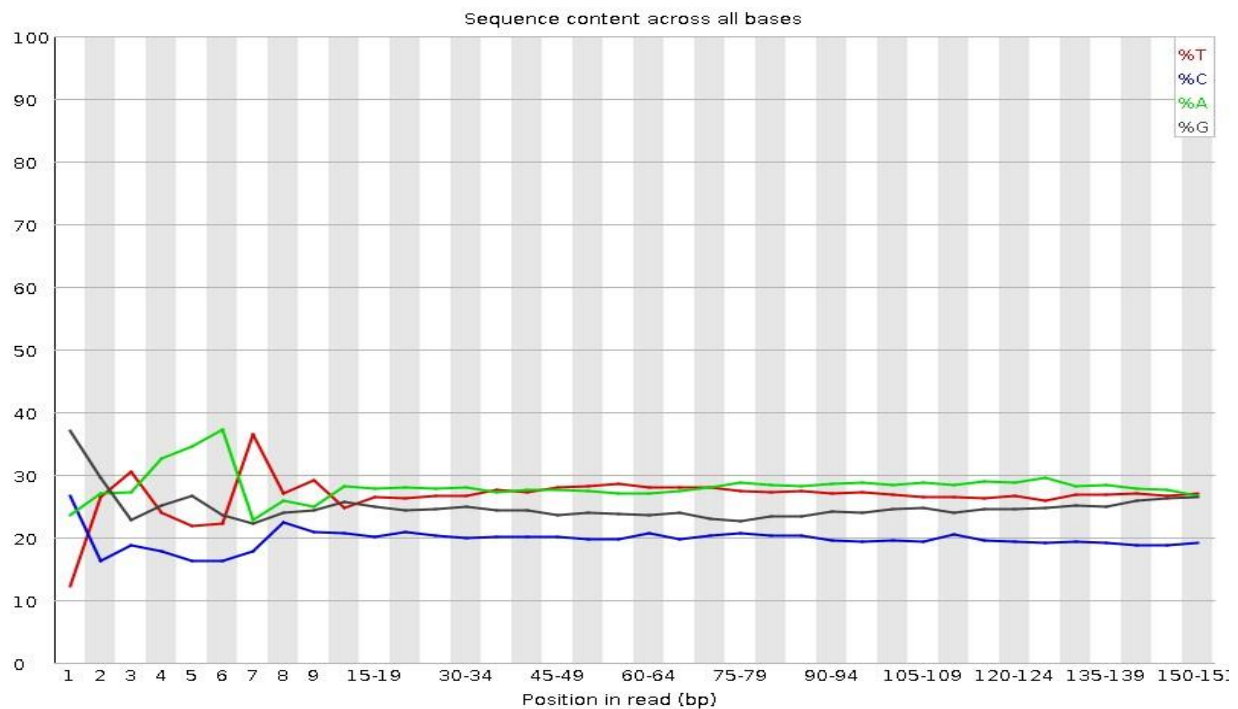

**File S2.5.** Summary of per base sequence content of the raw data in the cv. super strain B transcriptome under drought stress (fastq 2).

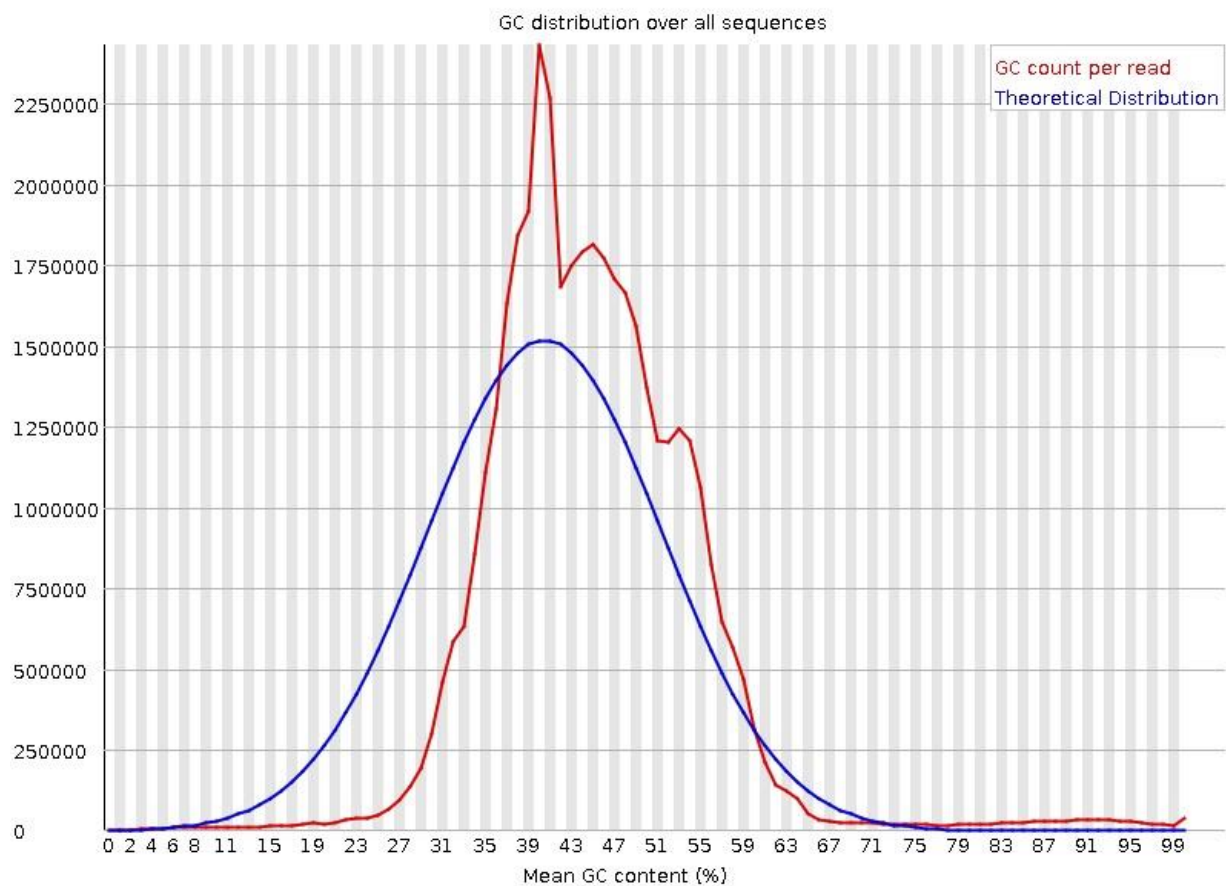

**File S2.6.** Summary of per sequence GC content of the raw data in the cv. super strain B transcriptome under drought stress (fastq 2).

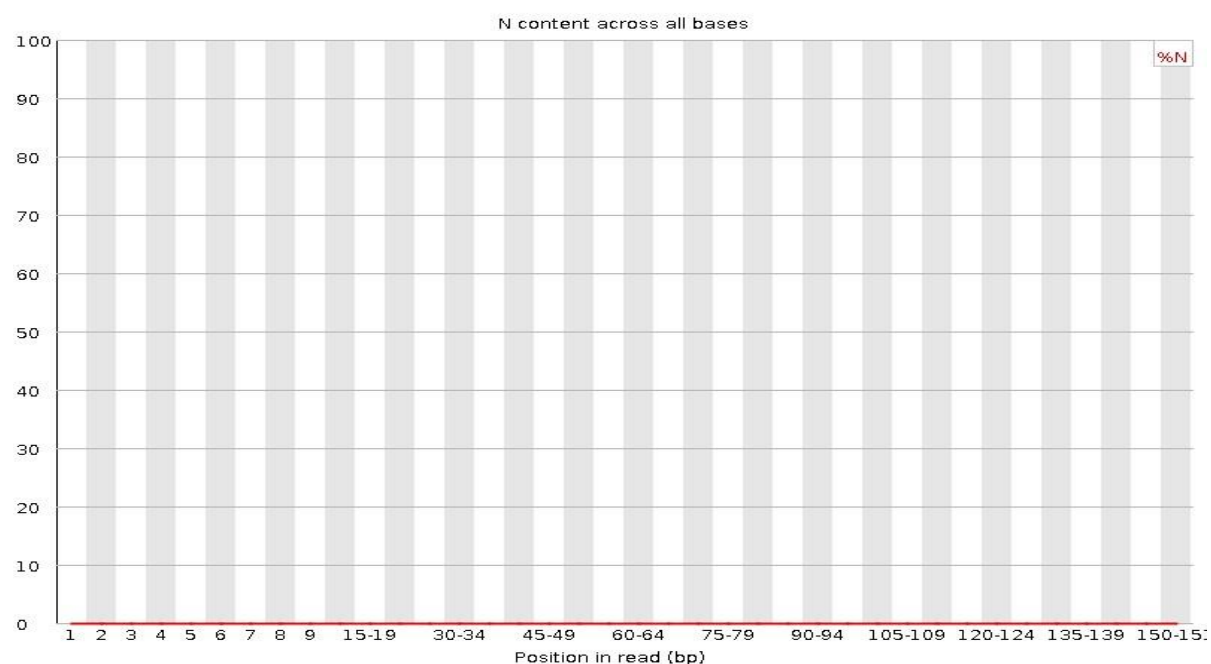

**File S2.7.** Per base N content plot of the raw data in the cv. super strain B transcriptome under drought stress (fastq 2).

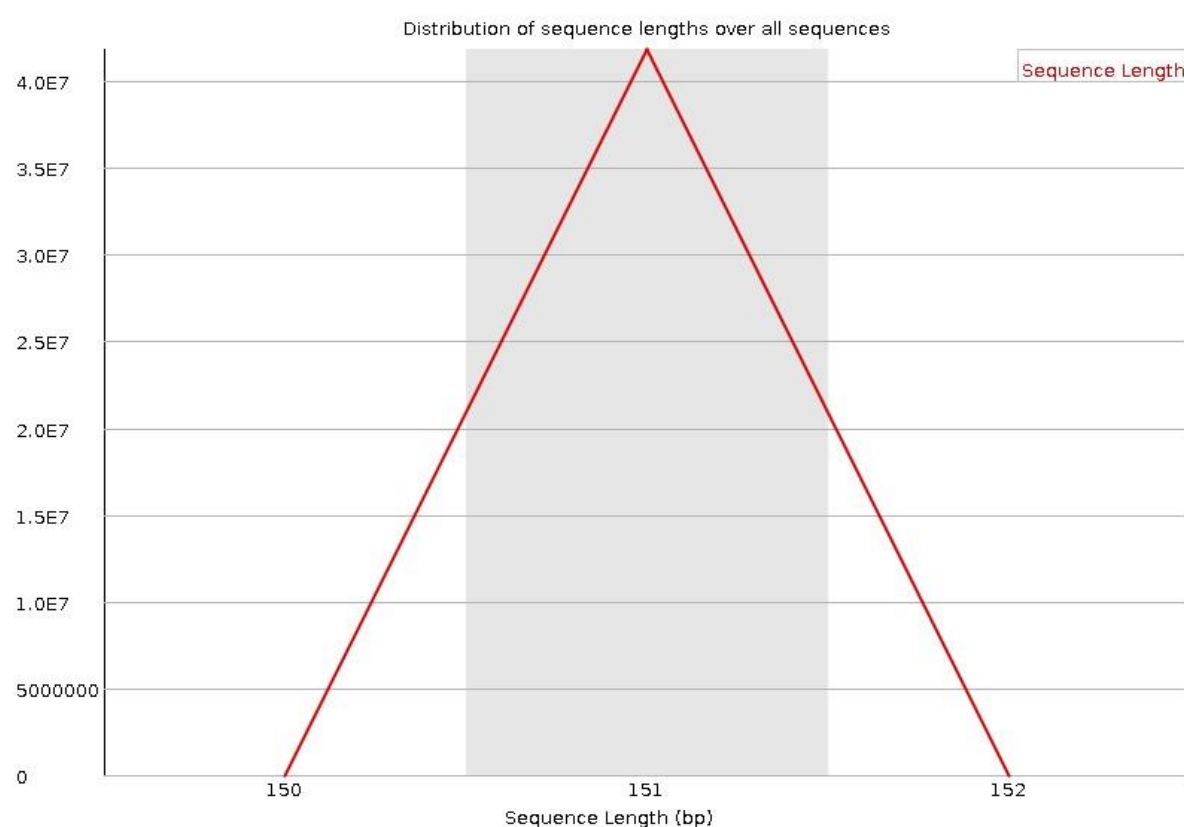

**File S2.8.** Sequence length distribution plot of quality scores of the raw data in the cv. super strain B transcriptome under drought stress (fastq 2).

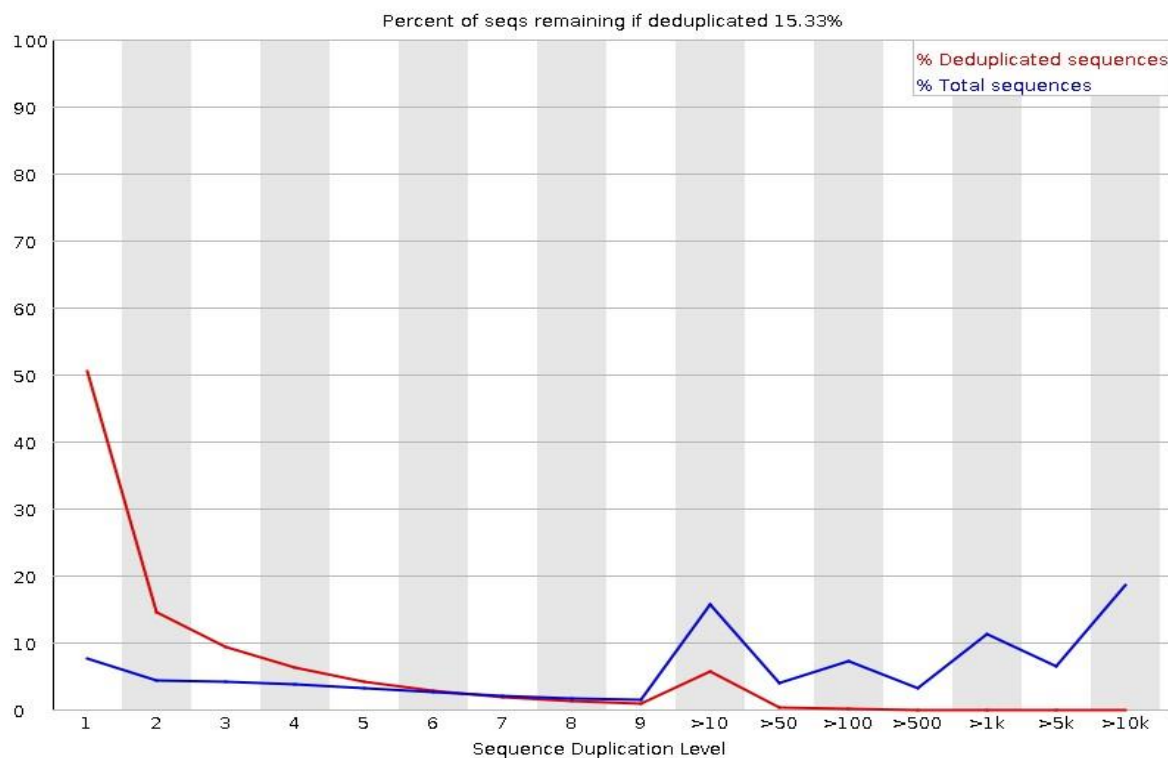

**File S2.9.** Sequences duplicated levels vs total sequences percentage of the raw data in the cv. super strain B transcriptome under drought stress (fastq 2).

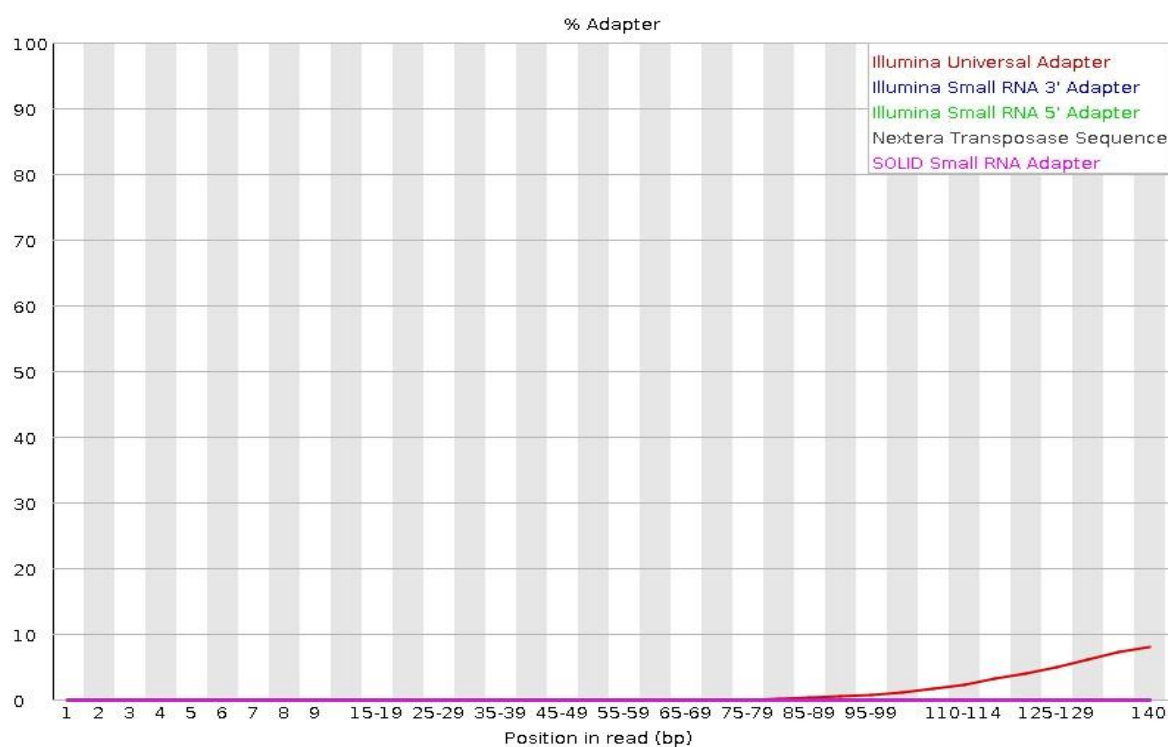

**File S2.10.** Adapter content percentages of the raw data in the cv. super strain B transcriptome under drought stress (fastq 2).

**File S2.11.** Summary of overrepresented sequences of the raw data in the cv. super strain B transcriptome under drought stress (fastq 2).

[illegible]

|                                                    |       |                     |        |
|----------------------------------------------------|-------|---------------------|--------|
| TGGACATTAATTAGGGCTGAAAGCCCTAACTTAATGGACGGGAGGTATCC | 48088 | 0.11509887965046399 | No Hit |
| AGAGGTAGGAATGGGAGTATTTGCACTTGTGGTAACGGTATTTGCATTAT | 46416 | 0.11109693890068076 | No Hit |
| CTCGTAACCAAACATGCACAGCGGTCAAACAGTATGTCCCAAGGGGACTT | 45974 | 0.11003900958763999 | No Hit |
| TGGGAGTATTTGCACTTGTGGTAACGGTATTTGCATTATTGATGGTTTTT | 45827 | 0.10968716431837076 | No Hit |
| CAAAGAATATCCCAATTATCCATAAACTGTAAGTAAGTGAGGCTCTCTC  | 44740 | 0.10708542412996504 | No Hit |
| GCCCAAGCTGCTCACAGTATACGGGCGTCGGCATCCAGACCGTCGGCTGA | 43703 | 0.1046033592032155  | No Hit |
