# Supplementary material for: De Novo Transcriptome Analysis of Solanum lycopersicum cv. Super Strain B under Drought Stress
Source: MDPI journal article supplement (doi:10.3390/agronomy13092360), 2023-09-11
Supplement: s1 [file s1]

## De novo transcriptome analysis of *Solanum lycopersicum* cv. super strain B under drought stress

Hassan S. Al-Zahrani<sup>a</sup>, Tarek A. A. Moussa<sup>a,b\*</sup>, Hameed Alsamadany<sup>a</sup>, Rehab M. Hafez<sup>b</sup> and Michael P. Fuller<sup>c</sup>

<sup>a</sup> Biological Sciences Department, Faculty of Science, King Abdulaziz University, Jeddah, Saudi Arabia

<sup>b</sup> Botany and Microbiology Department, Faculty of Science, Cairo University, Giza 12613, Egypt

<sup>c</sup> School of Biological and Marine Science, Faculty of Science and Engineering, University of Plymouth, Plymouth, UK

**File S1.1.** Basic statistics of the of the raw data in the cv. super strain B transcriptome under drought stress (fastq 1).

| Measure                           | Value                   |
|-----------------------------------|-------------------------|
| Filename                          | 1.fastq                 |
| File type                         | Conventional base calls |
| Encoding                          | Sanger / Illumina 1.9   |
| Total Sequences                   | 41779729                |
| Sequences flagged as poor quality | 0                       |
| Sequence length                   | 151                     |
| %GC                               | 44                      |

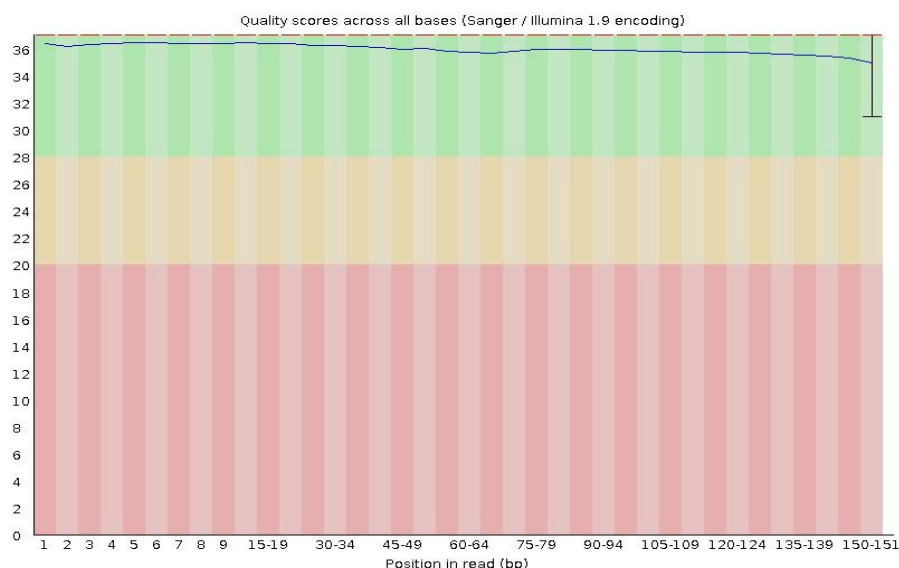

**File S1.2.** Summary of per base sequence quality of the raw data in the cv. super strain B transcriptome under drought stress (fastq 1).

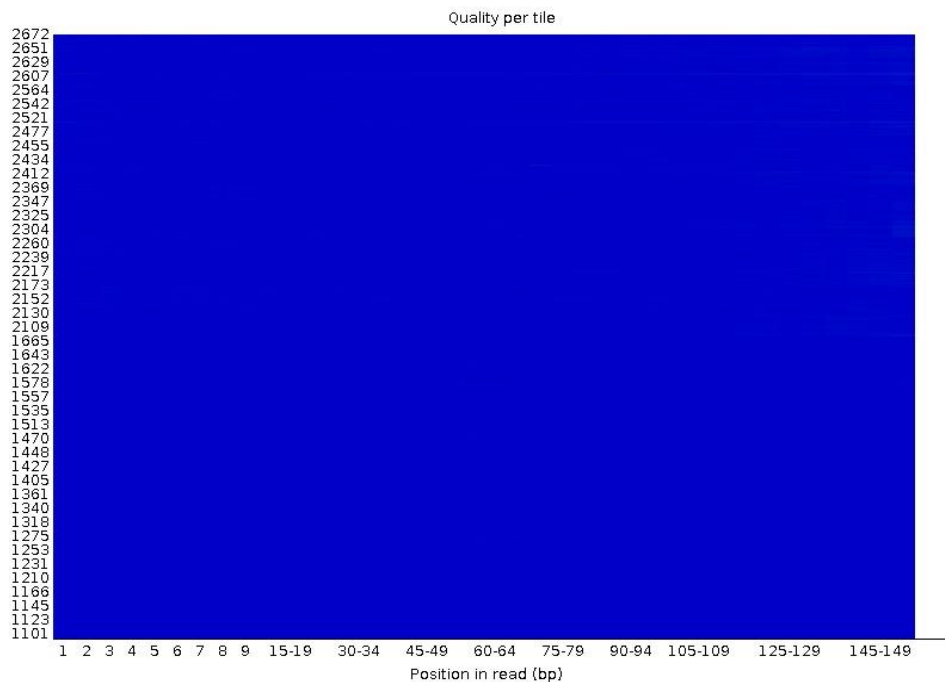

**File S1.3.** Summary of per tile sequence quality of the raw data in the cv. super strain B transcriptome under drought stress (fastq 1).

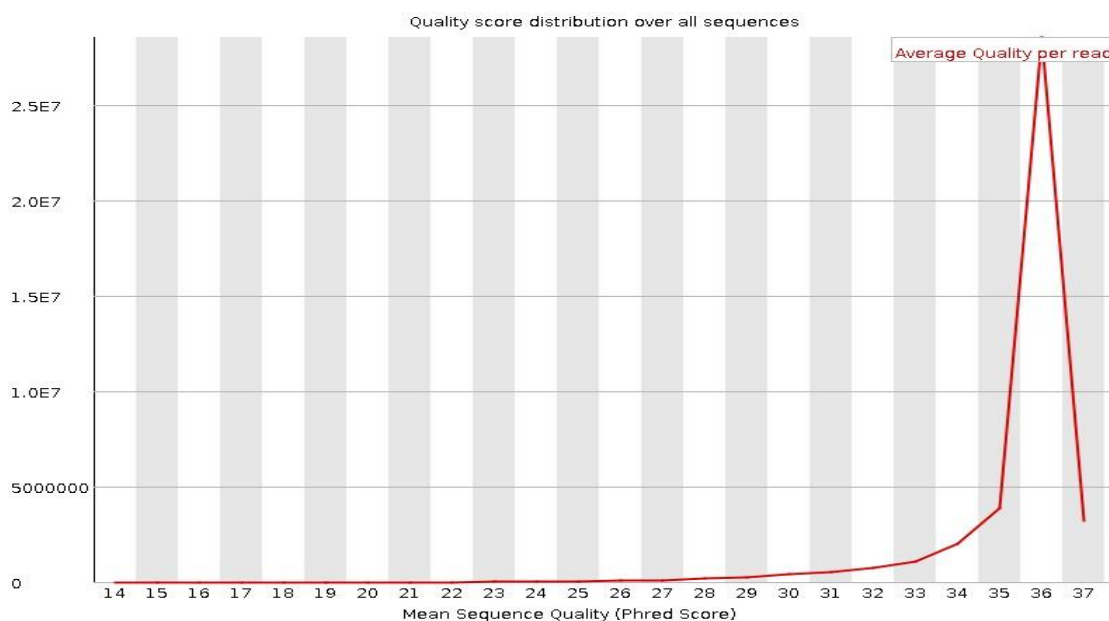

**File S1.4.** Summary of per sequence quality scores of the raw data in the cv. super strain B transcriptome under drought stress (fastq 1).

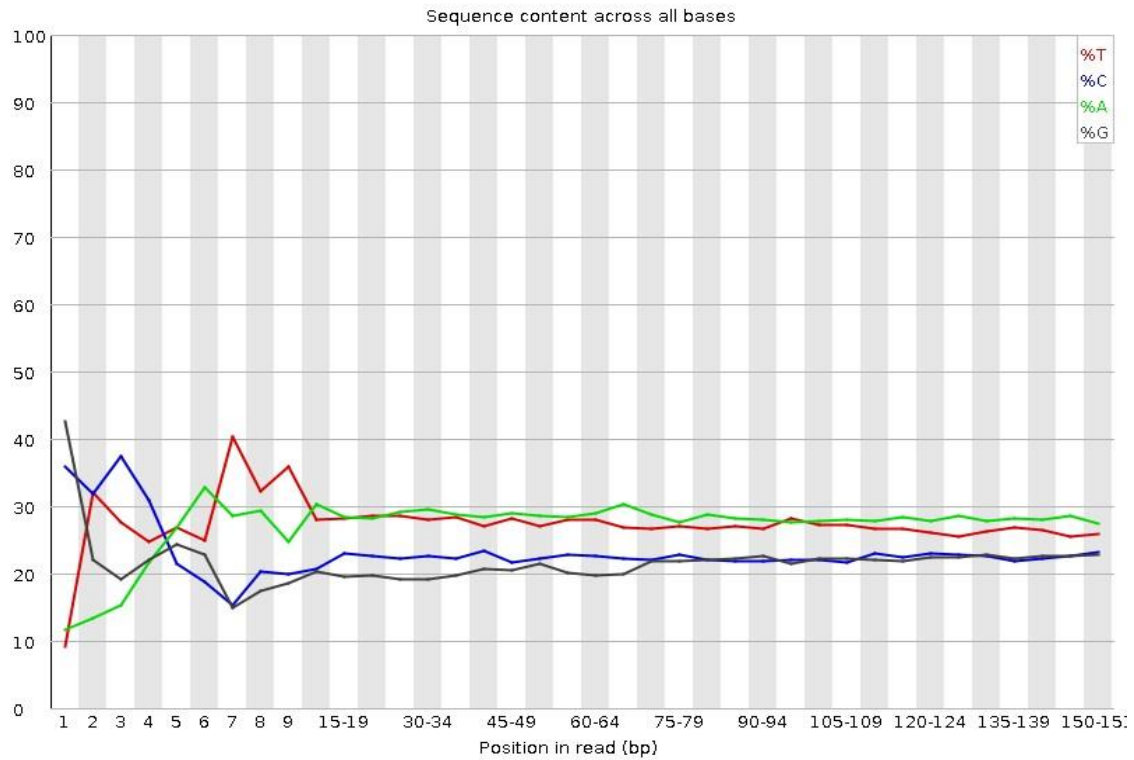

**File S1.5.** Summary of per base sequence content of the raw data in the cv. super strain B transcriptome under drought stress (fastq 1).

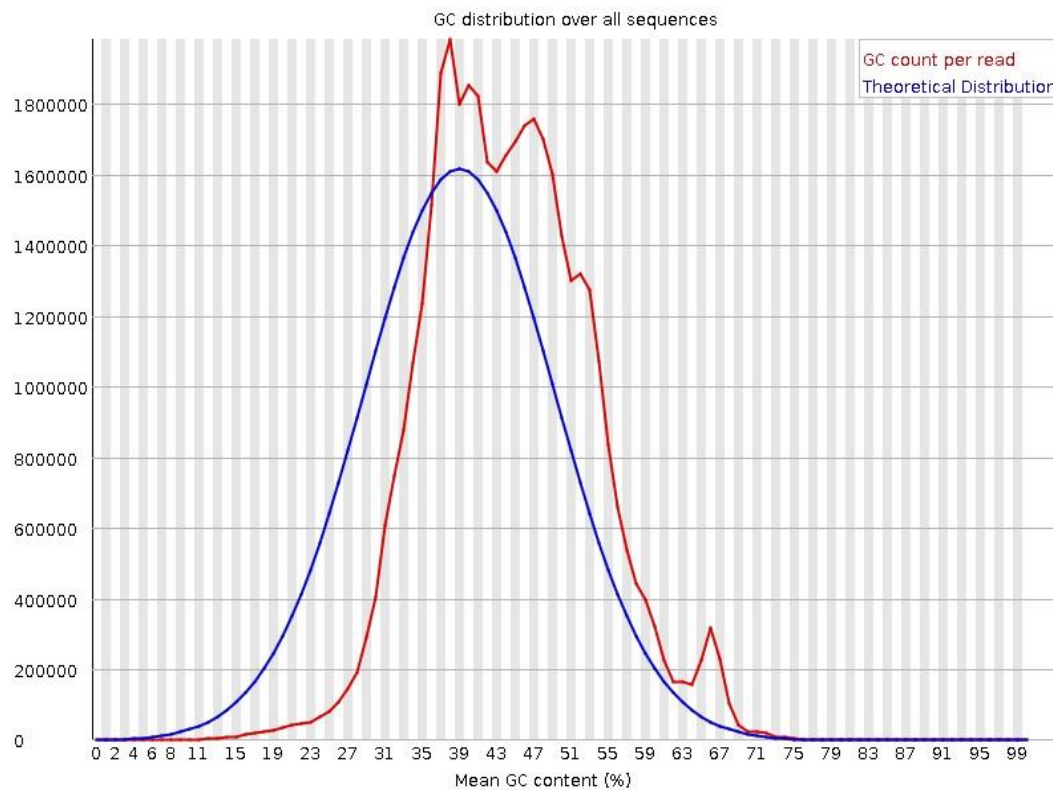

**File S1.6.** Summary of per sequence GC content of the raw data in the cv. super strain B transcriptome under drought stress (fastq 1).

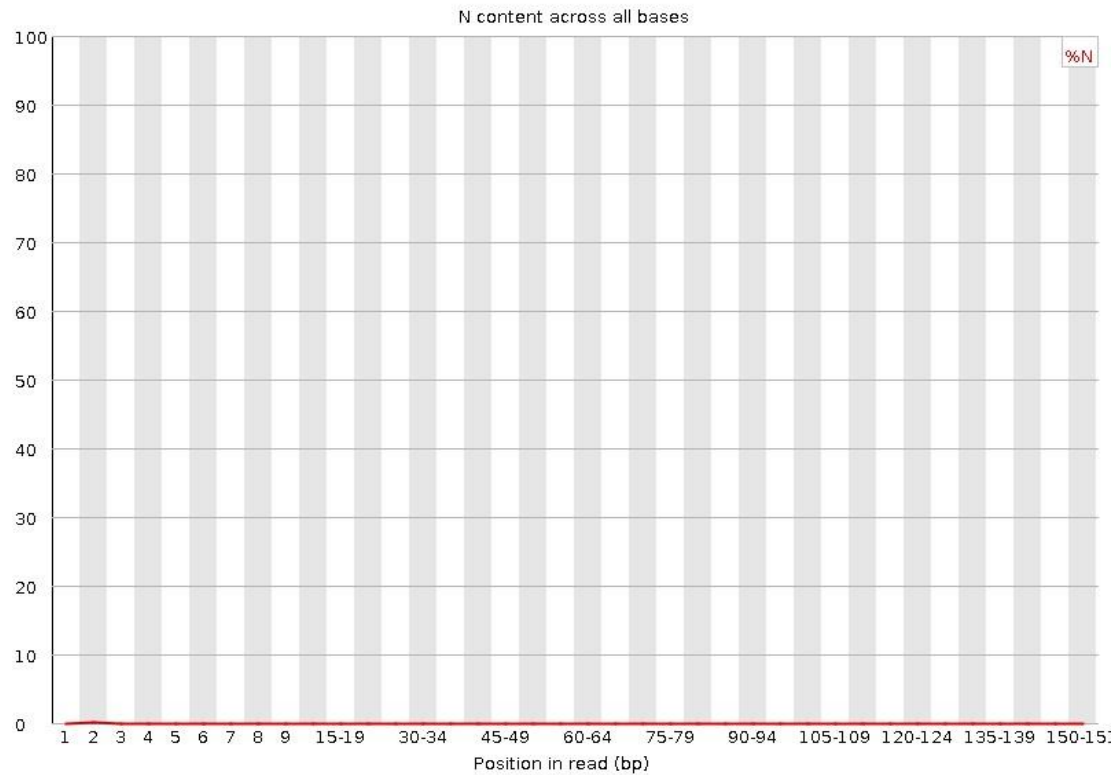

**File S1.7.** Per base N content plot of the raw data in the cv. super strain B transcriptome under drought stress (fastq 1).

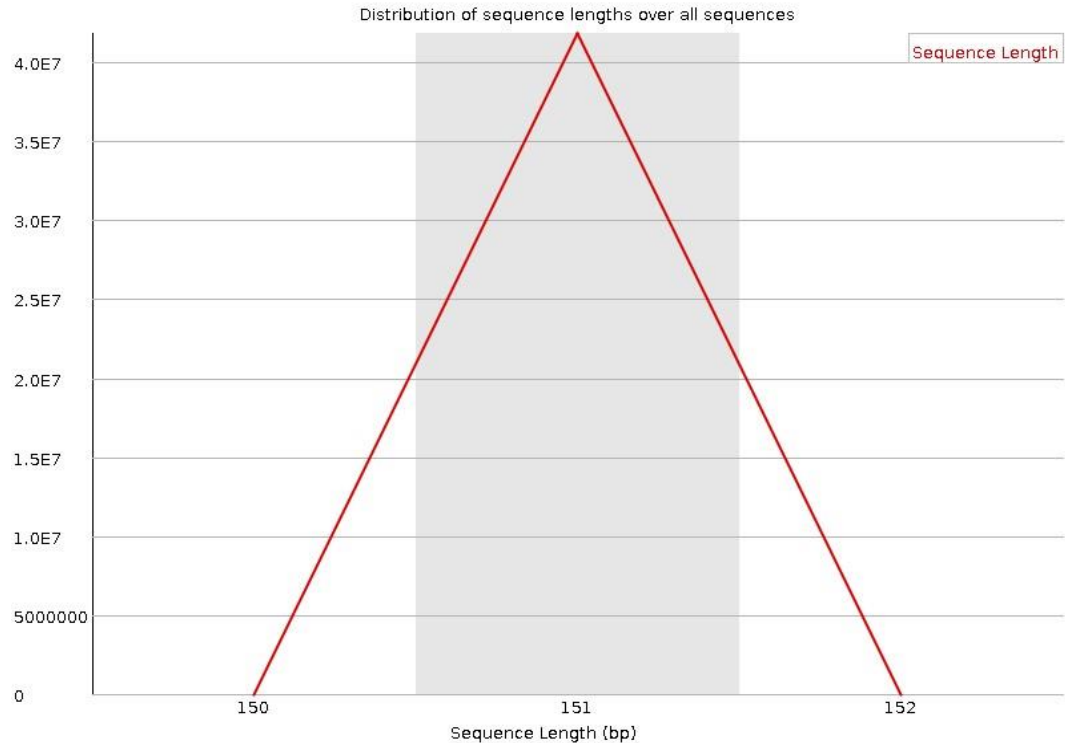

**File S1.8.** Sequence length distribution plot of quality scores of the raw data in the cv. super strain B transcriptome under drought stress (fastq 1).

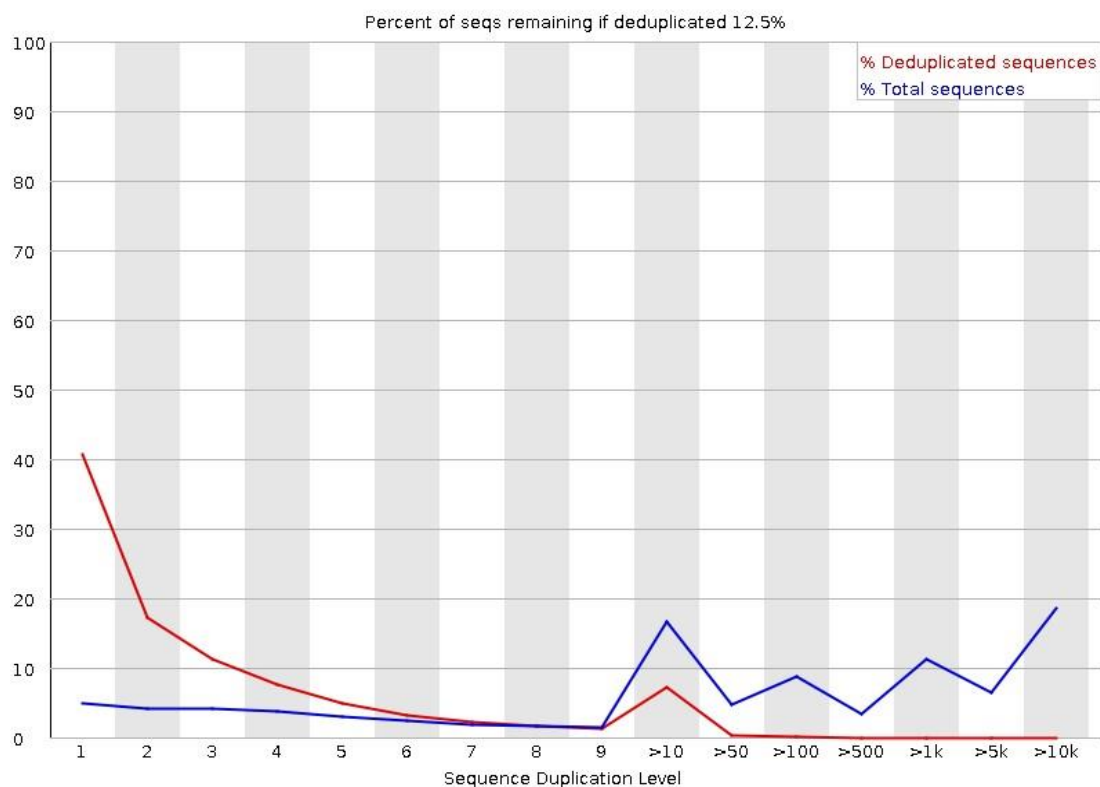

**File S1.9.** Sequences duplicated levels vs total sequences percentage of the raw data in the cv. super strain B transcriptome under drought stress (fastq 1).

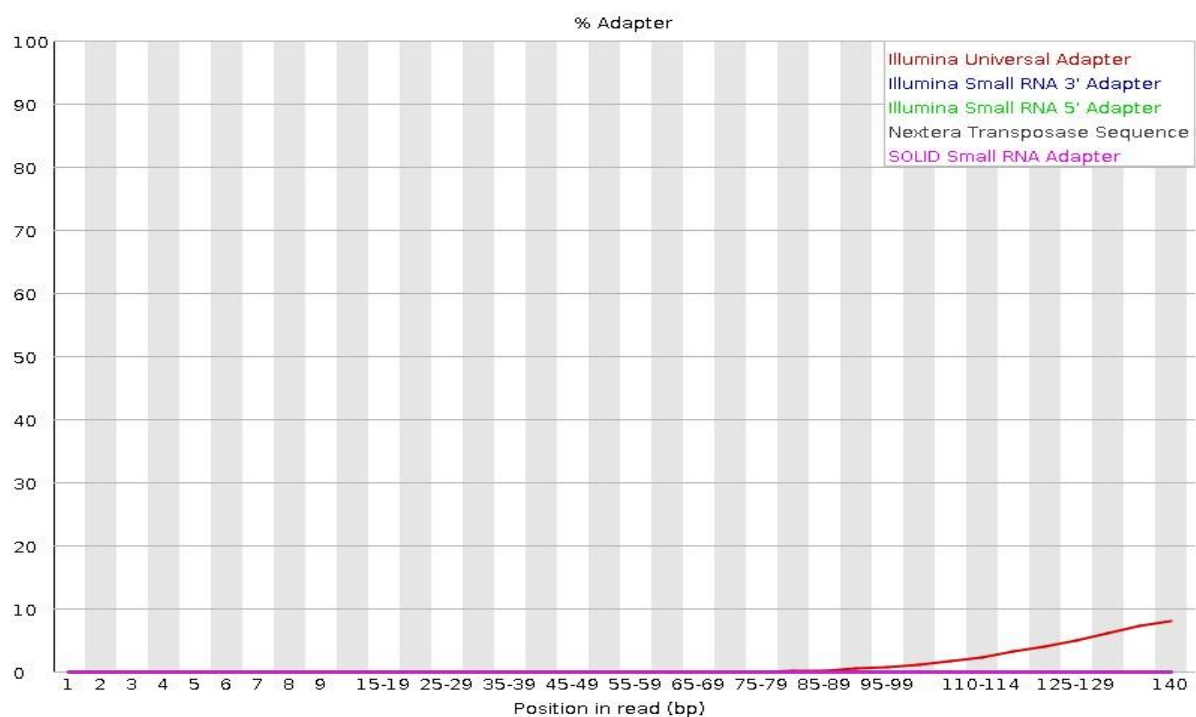

**File S1.10.** Adapter content percentages of the raw data in the cv. super strain B transcriptome under drought stress (fastq 1).

**File S1.11.** Summary of overrepresented sequences of the raw data in the cv. super strain B transcriptome under drought stress (fastq 1).

| Sequence                                            | Count  | Percentage          | Source                                   |
|-----------------------------------------------------|--------|---------------------|------------------------------------------|
| GATCGGAAGAGCACACGTCTGAACTCCAGTCACGTGAATCCATCTCGTAT  | 520605 | 1.2460707918904883  | TruSeq Adapter, Index 19 (97% over 40bp) |
| GCCTTATGTGATAGATGCCTCTTTAAAATATCTAAGTGCTGGGGTTATGA  | 340661 | 0.8153738862212342  | No Hit                                   |
| GATCGGAAGAGCACACGTCTGAACTCCAGTCACGTGAATCCATCGCGTAT  | 263803 | 0.6314138610137945  | TruSeq Adapter, Index 19 (97% over 40bp) |
| CCCATTTTTAGTTATAATGATGCCTTATGTGATAGATGCCTCTTTAAAAT  | 148312 | 0.35498554813507766 | No Hit                                   |
| GCCTCACTTAGTTACAGTTTTATGGATAATTGGGATATTCTTTGGTATAG  | 107293 | 0.25680635697756676 | No Hit                                   |
| GCCTCTTTAAAATATCTAAGTGCTGGGGTTATGAGTAGGGATGAGCATAA  | 103505 | 0.24773975915449334 | No Hit                                   |
| CTTATGTGATAGATGCCTCTTTAAAATATCTAAGTGCTGGGGTTATGAGT  | 98627  | 0.23606424062731476 | No Hit                                   |
| GGGGTTATGAGTAGGGATGAGCATAAACCAACAACCTCTCAAAGAAGATGG | 90524  | 0.21666966772331148 | No Hit                                   |
| GCCCATAACAATAGGAAATATCAGAAATCCAATAAGAATCAGCAATTGAG  | 89794  | 0.214922408903131   | No Hit                                   |
| GGGAAGCTATACTATATAGGTGGCTATCTATCCCTACCAAGGCTTATATT  | 76509  | 0.18312469188107944 | No Hit                                   |
| GGGCTATTGATATTTAACAAATATCCAGCAAAGGTTTTCCAGGAGATGT   | 69370  | 0.16603745802180767 | No Hit                                   |
| GGAAGCTATACTATATAGGTGGCTATCTATCCCTACCAAGGCTTATATTG  | 68605  | 0.16420642651846784 | No Hit                                   |
| GTGGCTATCTATCCCTACCAAGGCTTATATTGAAGTATAAACCAATGAGA  | 62016  | 0.1484356205374142  | No Hit                                   |
| GCCCGTTTCAGGTGGTCCTCAGCGTACGGCGGGACCTCTGAGAATTGGGA  | 60120  | 0.14389753461541122 | No Hit                                   |
| GCTGGGGTTATGAGTAGGGATGAGCATAAACCAACAACCTCTCAAAGAAGA | 60002  | 0.1436151009979026  | No Hit                                   |
| CCAGGAGATGTTGGAACCTCTACCAATTGGAGCTTTCTTAGCTGTCTTAGC | 57026  | 0.13649202942412575 | No Hit                                   |
| GCAGTAGTTTATAAGGAATATATCCATTTTTAGTTATAATGATGCCTTA   | 56759  | 0.13585296352688164 | No Hit                                   |
| GATGCCTTATGTGATAGATGCCTCTTTAAAATATCTAAGTGCTGGGGTTA  | 51324  | 0.12284426258485305 | No Hit                                   |
| GGGATATTCTTTGGTATAGTTGGGATTTTAATATCATTAATAGCATGATG  | 50262  | 0.12030236002727543 | No Hit                                   |
| GGCAGTTTCCAGAAACGTGTATCACATCTAGGCATGGAATCTTATGCCAG  | 48105  | 0.1151395692394271  | No Hit                                   |
| CTCGGCAATAGGATTGTAGCCCAGGATGAGTCCCTCAGCGTGACGCAGTA  | 45431  | 0.10873933624605367 | No Hit                                   |
| GTCCTTACAAGTCCGCTCCTCGGGGAGCTTGATTGATAATTCTGTATAAG  | 45288  | 0.10839706499771697 | No Hit                                   |
| GGCGTGGTAGAATTACTGGCACTCCAATGATTCCATATAACGGCCATAAT  | 44775  | 0.10716919681312438 | No Hit                                   |
| GTAGTTTATAAGGAATATATCCATTTTTAGTTATAATGATGCCTTATGT   | 43012  | 0.10294944708712687 | No Hit                                   |
