# Supplementary material for: De Novo Transcriptome Analysis of Solanum lycopersicum cv. Super Strain B under Drought Stress
Source: MDPI journal article supplement (doi:10.3390/agronomy13092360), 2023-09-11
Supplement: s1 [file s1]

**De novo transcriptome analysis of *Solanum lycopersicum* cv. super strain B under drought stress**

**Hassan S. Al-Zahrani<sup>a</sup>, Tarek A. A. Moussa<sup>a,b\*</sup>, Hameed Alsamadany<sup>a</sup>, Rehab M. Hafez<sup>b</sup> and Michael P. Fuller<sup>c</sup>**

<sup>a</sup> Biological Sciences Department, Faculty of Science, King Abdulaziz University, Jeddah, Saudi Arabia

<sup>b</sup> Botany and Microbiology Department, Faculty of Science, Cairo University, Giza 12613, Egypt

<sup>c</sup> School of Biological and Marine Science, Faculty of Science and Engineering, University of Plymouth, Plymouth, UK

**File S4.1.** Basic statistics of the of the trimmed data in the cv. super strain B transcriptome under drought stress (fastq 2).

| Measure                           | Value                   |
|-----------------------------------|-------------------------|
| Filename                          | trim.2.fastq            |
| File type                         | Conventional base calls |
| Encoding                          | Sanger / Illumina 1.9   |
| Total Sequences                   | 41083929                |
| Sequences flagged as poor quality | 0                       |
| Sequence length                   | 20-151                  |
| %GC                               | 44                      |

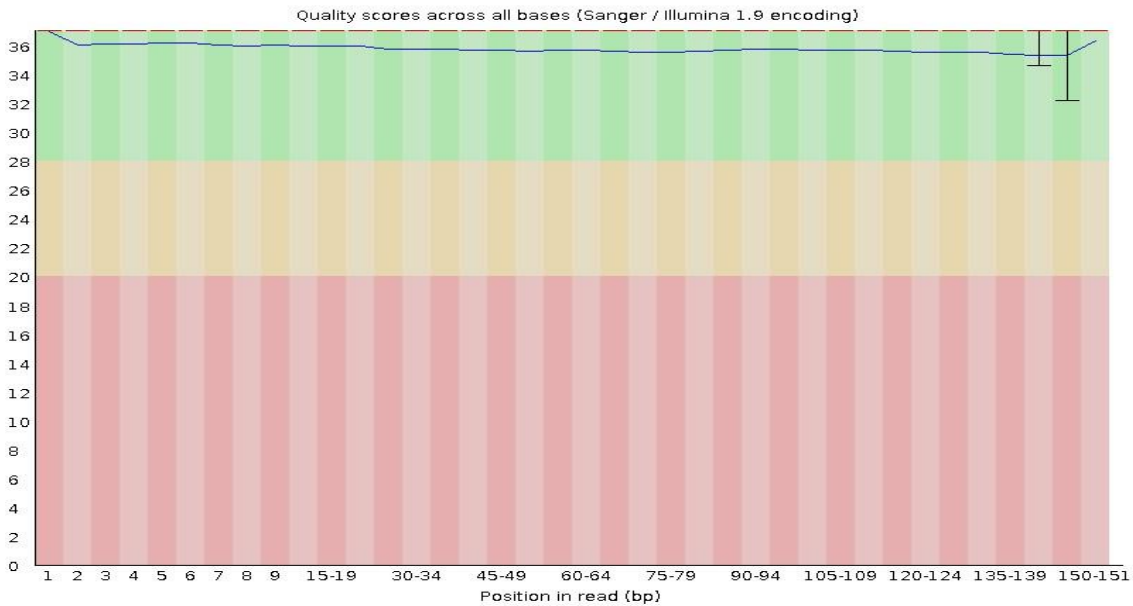

**File S4.2.** Summary of per base sequence quality of the trimmed data in the cv. super strain B transcriptome under drought stress (fastq 2).

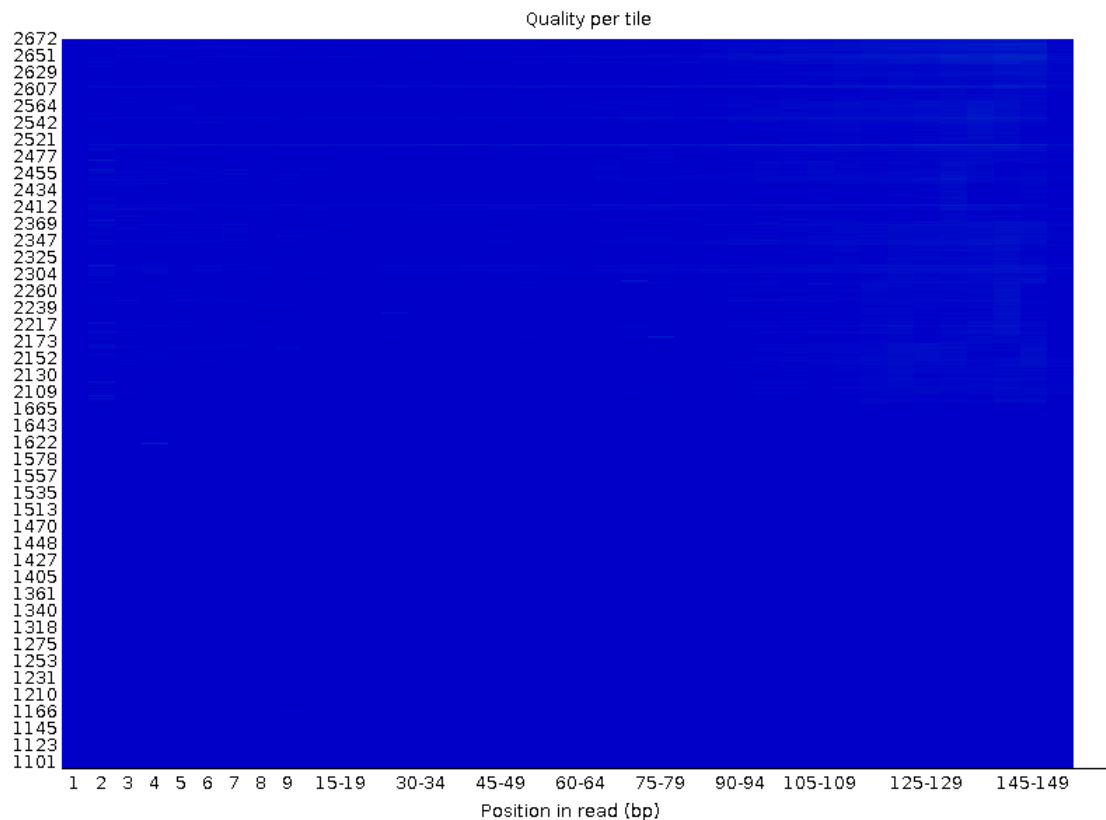

**File S4.3.** Summary of per tile sequence quality of the trimmed data in the cv. super strain B transcriptome under drought stress (fastq 2).

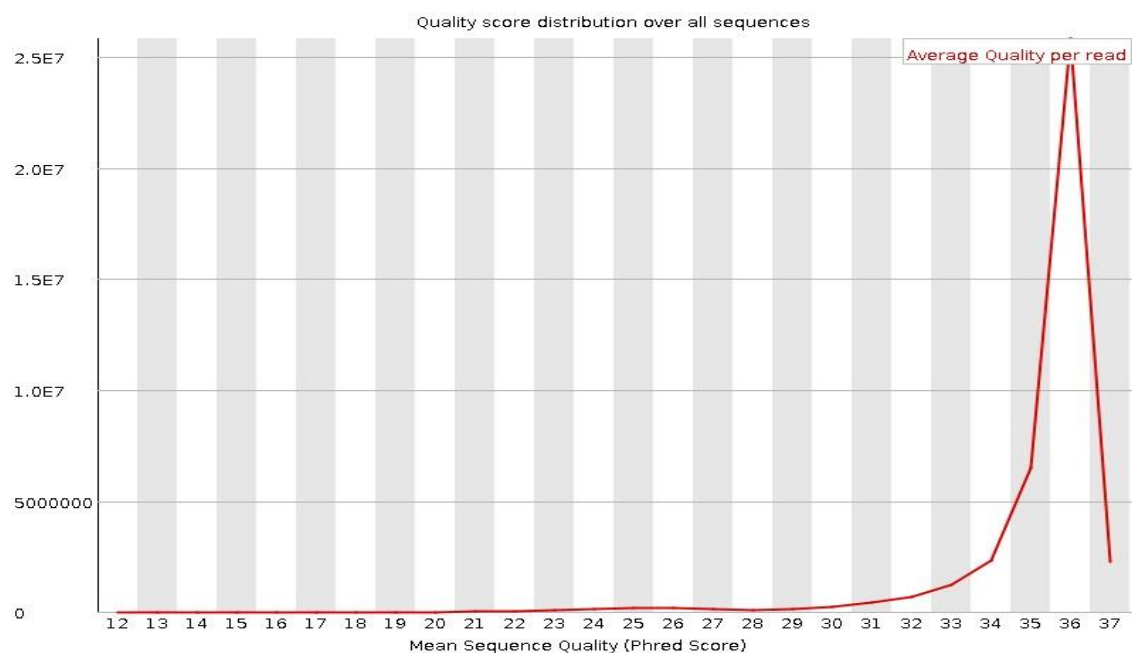

**File S4.4.** Summary of per sequence quality scores of the trimmed data in the cv. super strain B transcriptome under drought stress (fastq 2).

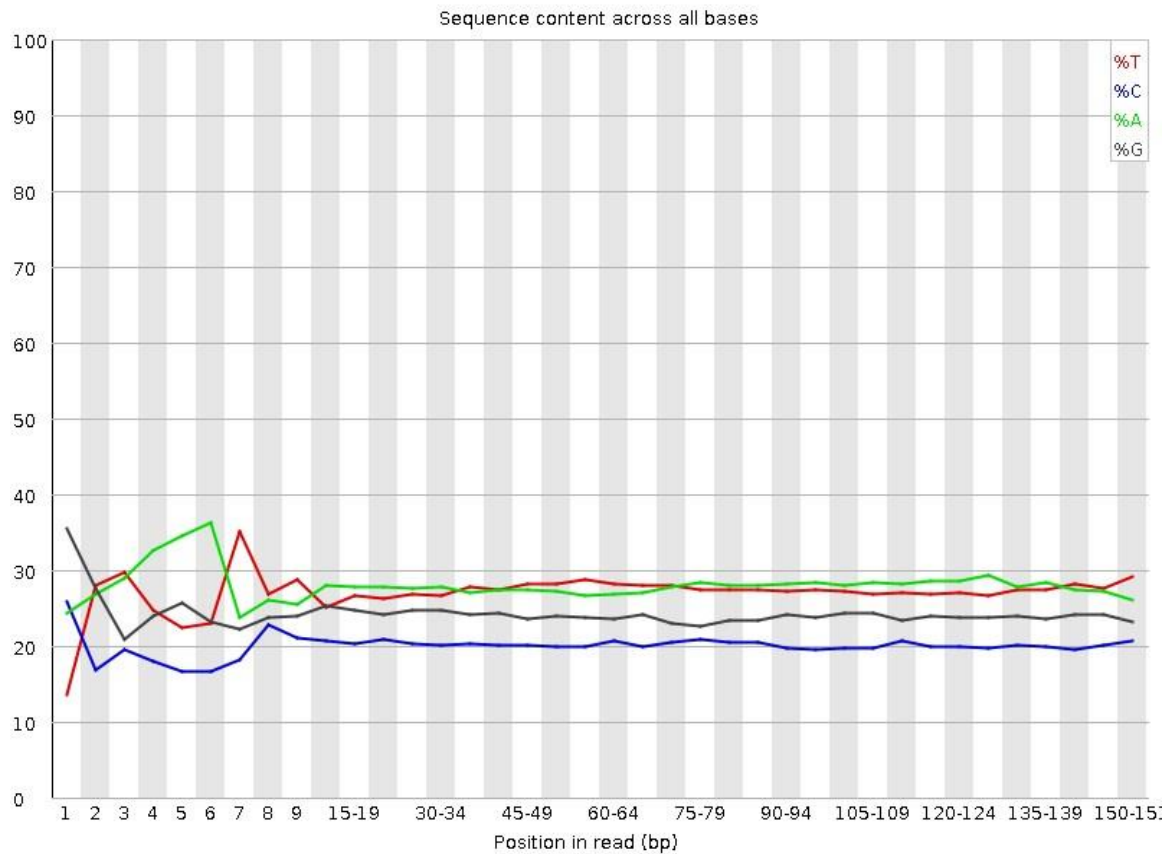

**File S4.5.** Summary of per base sequence content of the trimmed data in the cv. super strain B transcriptome under drought stress (fastq 2).

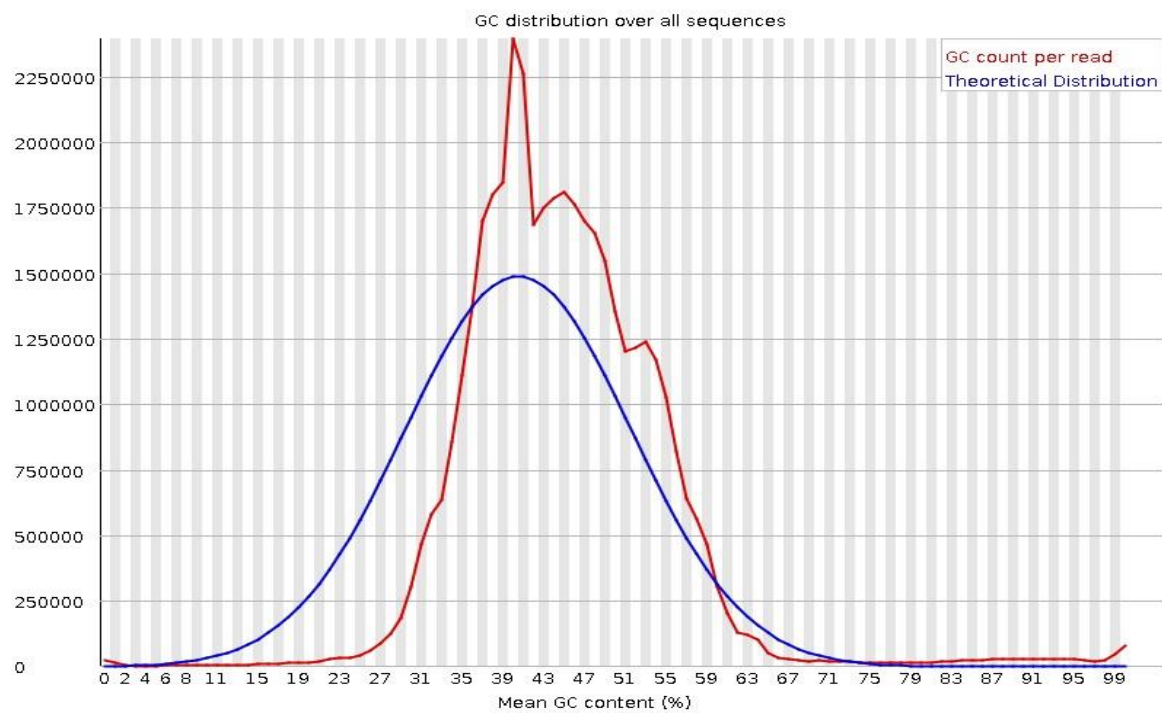

**File S4.6.** Summary of per sequence GC content of the trimmed data in the cv. super strain B transcriptome under drought stress (fastq 2).

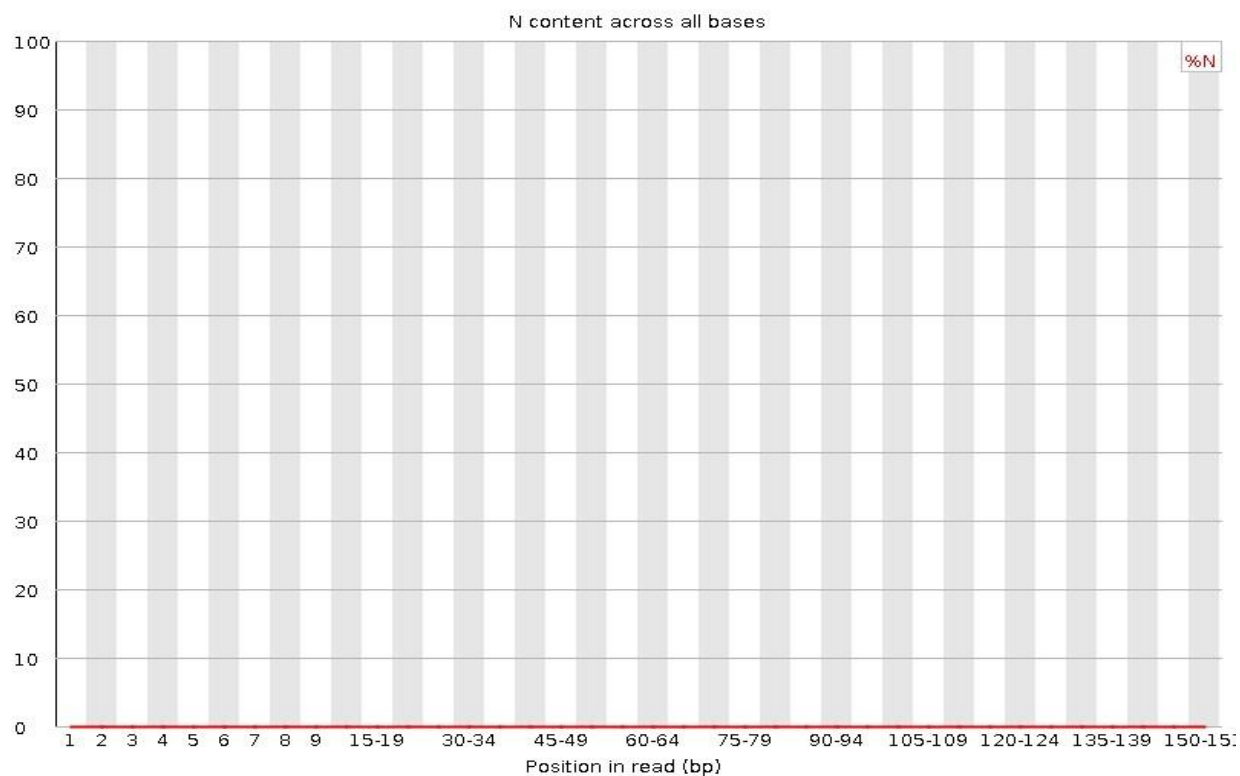

**File S4.7.** Per base N content plot of the trimmed data in the cv. super strain B transcriptome under drought stress (fastq 2).

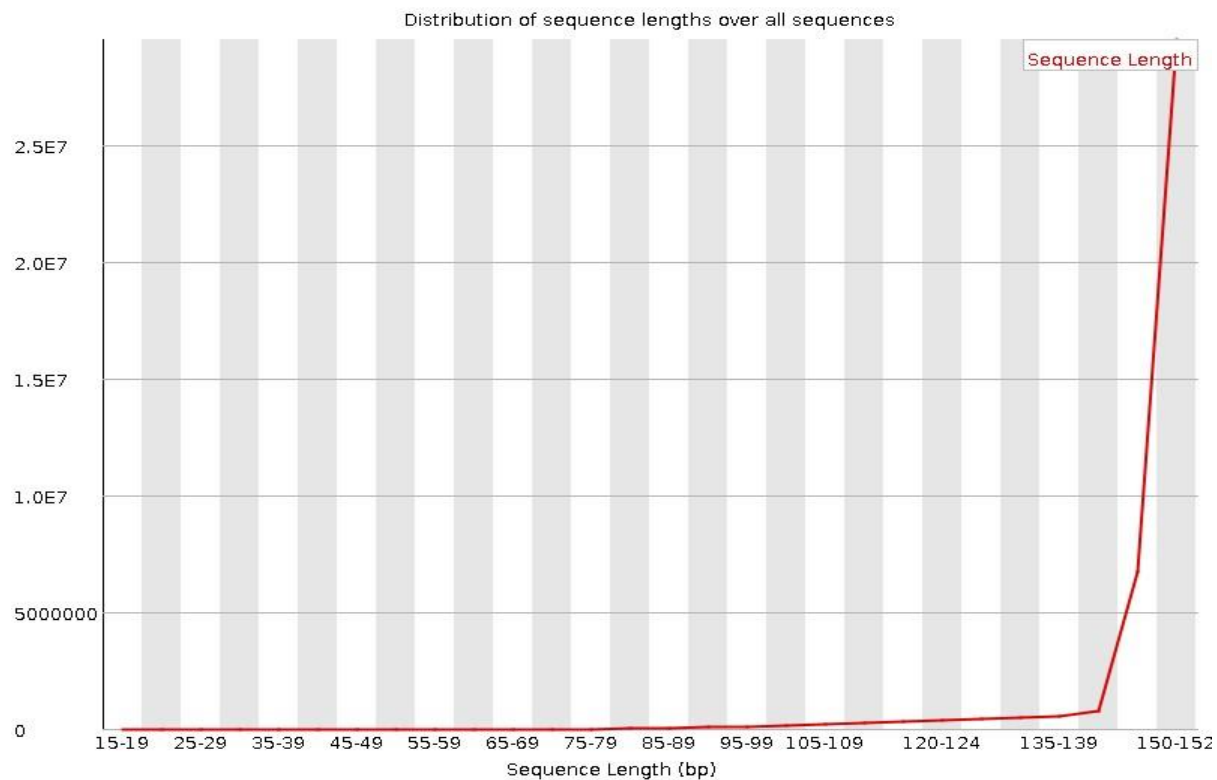

**File S4.8.** Sequence length distribution plot of quality scores of the trimmed data in the cv. super strain B transcriptome under drought stress (fastq 2).

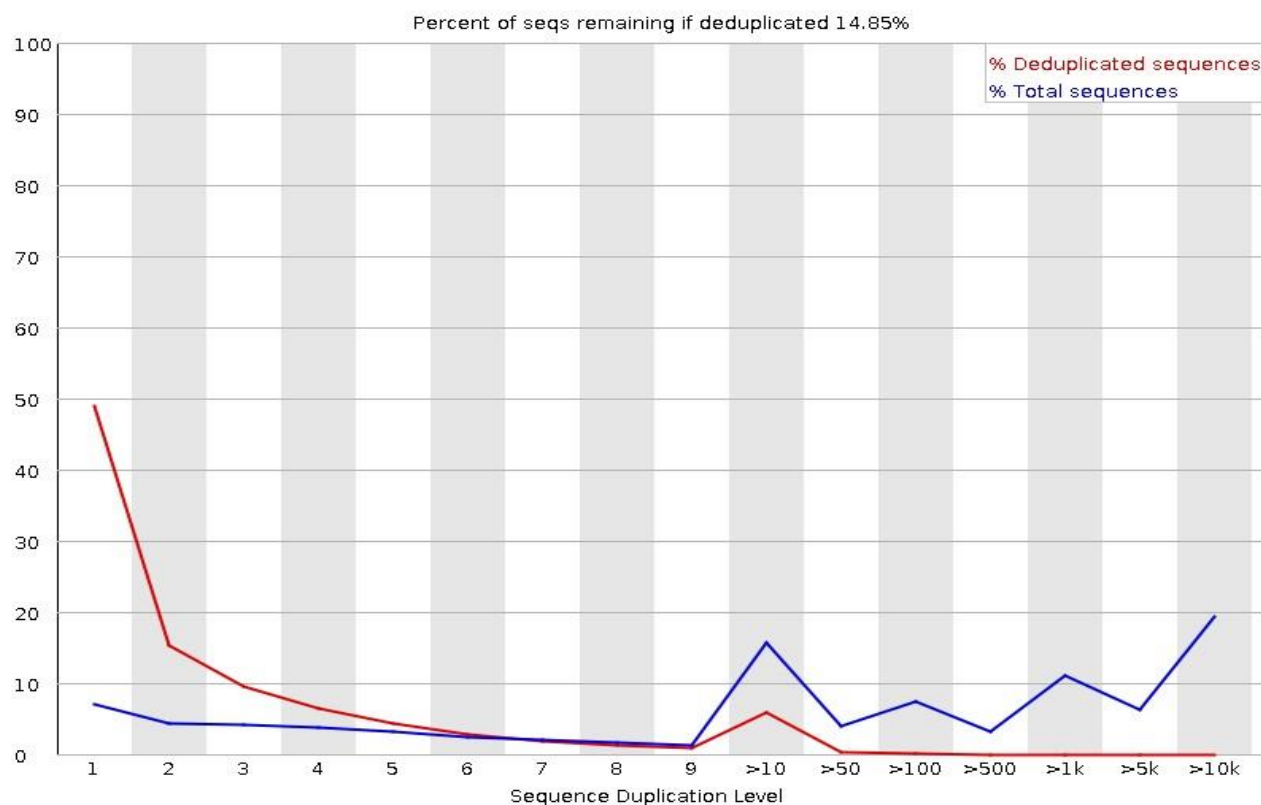

**File S4.9.** Sequences duplicated levels vs total sequences percentage of the trimmed data in the cv. super strain B transcriptome under drought stress (fastq 2).

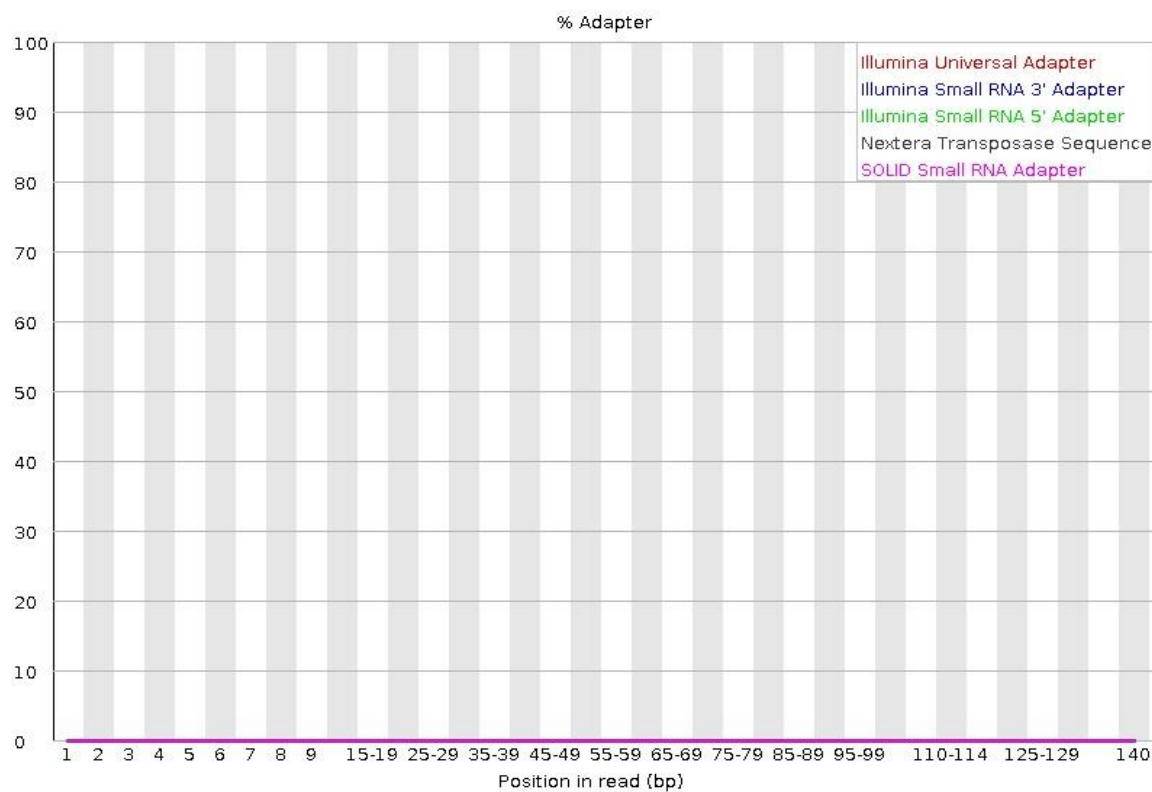

**File S4.10.** Adapter content percentages of the trimmed data in the cv. super strain B transcriptome under drought stress (fastq 2).

**File S4.11.** Summary of overrepresented sequences of the trimmed data in the cv. super strain B transcriptome under drought stress (fastq 2).

[illegible]

|                                                    |       |                     |        |
|----------------------------------------------------|-------|---------------------|--------|
| GGGAGGTATCCCAATAGGAGGTTTCCTCCTATGGTTTTCAAACAATCAC  | 50031 | 0.12177754469393616 | No Hit |
| TGGACATTAATTAGGGCTGAAAGCCCTAACTTAATGGACGGGAGGTATCC | 47149 | 0.1147626362610061  | No Hit |
| GCGTCGGCATCCAGACCGTCGGCTGATCGTGGTTTTACTAGGCTAGACTA | 46984 | 0.11436101936599101 | No Hit |
| TGGGAGTATTTGCACTTGTGGTAACGGTATTTGCATTATTGATGGTTTTT | 44791 | 0.10902316572497242 | No Hit |
| CTCGTAACCAAACATGCACAGCGGTCAAACAGTATGTCCCAAGGGGACTT | 44429 | 0.1081420425977272  | No Hit |
| CAAAGAATATCCCAATTATCCATAAACTGTAAC TAAGTGAGGCTCTCTC | 44174 | 0.10752136194179482 | No Hit |
| GCCCAAGCTGCTCACAGTATACGGGCGTCGGCATCCAGACCGTCGGCTGA | 41532 | 0.10109062353797758 | No Hit |
